# Supplementary material
Source: PubMed Central journal article supplement (PMC4320017)
Supplement: NIHMS638408-supplement-6.pdf [file NIHMS638408-supplement-6.pdf]

|                                   |                            |                    |       |
|-----------------------------------|----------------------------|--------------------|-------|
| <b>Southern Blot Screening</b>    |                            |                    |       |
| Southern5'Probe5'                 | AGTTGCTGGCAGTGAGGAAT       |                    |       |
| Southern5'Probe3'                 | AGGAATGCCACAAAGGGTTA       |                    |       |
|                                   |                            |                    |       |
| Southern3'Probe5'                 | CCCCTGCCTTGTTCTTTGTA       |                    |       |
| Southern3'Probe3'                 | ACACCTGCATTCTTCCAAGC       |                    |       |
|                                   |                            |                    |       |
| <b>Genotyping</b>                 |                            |                    |       |
| Lrig1 Wildtype 5'                 | TCTGGCTGCTCTTGCTGCTACT     |                    |       |
| Lrig1 Apple 5'                    | ACGAGCTGTACAAGTAACCGGACT   |                    |       |
| Lrig1 Wildtype 3'                 | GACTTCACGAGGCACACTCGAT     |                    |       |
|                                   |                            |                    |       |
| <b>PGK-Neo Cassette Detection</b> |                            |                    |       |
| Neo 5'                            | CTGTGCTCGACGTTGTCACTG      |                    |       |
| and Neo 3'                        | GATCCCCTCAGAAGAACTCGT      |                    |       |
|                                   |                            |                    |       |
| <b>qRT-PCR</b>                    |                            |                    |       |
| <i>Lrig1</i> 5'                   | TAGAGGAGTGGCATCTGGAG       |                    |       |
| <i>Lrig1</i> 3'                   | CCATGCGCTAAGGATTA AAA      |                    |       |
|                                   |                            |                    |       |
| <i>Lgr5</i> 5'                    | GGAAGCGCTACAGAATTTGA       |                    |       |
| <i>Lgr5</i> 3'                    | AGGCGTAGTCTGCTATGTGG       |                    |       |
|                                   |                            |                    |       |
| <i>cKit</i> 5'                    | TCATCGAGTGTGAGGGAAA        |                    |       |
| <i>cKit</i> 3'                    | GGTGACTTGTTTCAGGCACA       |                    |       |
|                                   |                            |                    |       |
| <i>Muc2</i> 5'                    | GGTCCAGGGTCTGGATCACA       |                    |       |
| <i>Muc2</i> 3'                    | GCTCAGTCACTGCCATCTG        |                    |       |
|                                   |                            |                    |       |
| <i>Villin</i> 5'                  | GATCTCCCAGGTGGTGGCTGC      |                    |       |
| <i>Villin</i> 3'                  | CGGGAGTGGTGATGTTGAGAGAGC   |                    |       |
|                                   |                            |                    |       |
| <i>Car1</i> 5'                    | AGAAAATGGCAAGTGCAGAC       |                    |       |
| <i>Car1</i> 3'                    | AATTTCTTTGGCAGTTGCAG       |                    |       |
|                                   |                            |                    |       |
| <b><i>Lrig1</i> ISH</b>           |                            |                    |       |
| <i>Lrig1</i> probe5'              | GCTCTAGAGGGGGTCCCTCTATCCAA | antisense: XhoI/T7 | 750bp |
| <i>Lrig1</i> probe3'              | GGACTAGTATGCCCTCCTTTCCAACC | sense: SpeI/T3     |       |
